# Supplementary material
Source: PubMed Central journal article supplement (PMC4062101)
Supplement: NIHMS555026-supplement-01.pdf [file NIHMS555026-supplement-01.pdf]

**Supplementary Table S1. Genomic Loci of provirus Integration in leukemia clone**

Genomic loci representation of provirus integration “YourSeq” in upper and lower panels in the leukemic clone identified in two primary mice and one secondary mouse (Figure 4). The scale is adjusted in each panel to include the entire coding region of the gene where the provirus integration was identified, *Meis1* (upper panel) and *Zfp606* (lower panel).

| Mouse Number | Condition                   | Clonality | Major Hits | Sequence                                                                                                                                                                                                                                                                                                                                                      |
|--------------|-----------------------------|-----------|------------|---------------------------------------------------------------------------------------------------------------------------------------------------------------------------------------------------------------------------------------------------------------------------------------------------------------------------------------------------------------|
| 11           | Leukemia                    | Clonal    | Meis 1     | AATACCCTGCTCTGGATTTGACTGGCACCT<br>TCACA                                                                                                                                                                                                                                                                                                                       |
|              |                             |           | ZFP606     | TAAAATTTTGTITTTATTTTGTITTTATTTGTT<br>TTGTTTTGTTTTATTTTCAGTGACTTTTATATT<br>TTTTGAAGGAGCTATAAA                                                                                                                                                                                                                                                                  |
| 14           | Leukemia                    | Clonal    | Meis 1     | GTATACCCTGCTCTGGATTTGACTGGCACC<br>TTCACACAGTGCCATACATTTACACAGACA<br>CACATGCATAAATA                                                                                                                                                                                                                                                                            |
|              |                             |           | ZFP606     | TAAAATTTTGTITTTATTTTGTITTTATTTGTT<br>TTGTTTTGTTTTATTTTCAGTGACTTTATA                                                                                                                                                                                                                                                                                           |
| 15           | Leukemia                    | Clonal    | Meis 1     | GATACCCTGCTCTGGATTTGACTGGCACCT<br>TCACACAGTGCCATACATTTACACAGACAC<br>ACATGCATAAAATAAAAAAATAAATAT                                                                                                                                                                                                                                                               |
|              |                             |           | ZFP606     | AATTTTGTITTTATTTTGTITTTATTTGTTTGT<br>TTGTTTTATTTTCAGTGACTTTATATTTTTTG<br>AAGGA                                                                                                                                                                                                                                                                                |
| 126          | Myeloproliferative disorder | Clonal    | Diap2      | TTCCACCCAGAAAGAGACTATGTAATAAGC<br>CATAGAAATAAGAAGTGGTTAATTGTGGGG<br>CAATGGGCTATGCACAGACAGCCTGGTCT<br>CCAGTCGAACTTAGGTCTTGAACCCAGTG<br>GGACCCAATGGGTGATAATTTCCACCTACA<br>TGGGACAGAAGGCATTTCGATCATGTCTCCT<br>GAACCCCTGGCTTCTGTGCAAGTTACTGTC<br>CCCACAGCCCCACAGGAGAGTTCGTGTGG<br>CTAACAGTCACATAGACAATGTCCAAGCT<br>TCTGGCATTCTGGCTAGACTCCTCCCACA<br>GTTACCTAGCAAC |
|              |                             |           | ZFP946     | ATAGTCCTTATAAATTAACCTCAGAGATACA<br>ACTGTTGAATCATCAAAGCTAAACAGACAT<br>AGAAGTGGAAACATCAGAGAA                                                                                                                                                                                                                                                                    |

**Supplementary Table S2.** Gene expression microarray was performed and 229 genes and 48 genes were differentially expressed between *HOXC6* and GMPs or *HOXC6* and CMPs, respectively (at a p-value of <0.05 after adjustment for multiple testing). Genes are listed from left upper corner to the right lower corner in the height of their regulation.

| HOXC6 vs GMP  |                 |               |               | HOXC6 vs CMP  |               |
|---------------|-----------------|---------------|---------------|---------------|---------------|
| HMG2          | HSPA14          | DUSP2         | BLOC1S2       | HAT1          | SGSH          |
| CBFA2T3H      | ABCF2           | TFRC          | P2RY1         | GLRX1         | LOC630729     |
| PGD           | A230056E14RIK   | FYN           | PSMB2         | LINGO2        | S100A4        |
| MED21         | GJA1            | 1110014O20RIK | AUTS2         | TSC22D1       | A130086G11RIK |
| GOT2          | 4631426J05RIK   | MBOAT2        | TAF9          | SH3GLB1       | ITGAL         |
| VPS13C        | ZBTB38          | USP48         | 2010004M13RIK | TOR1A         | SOX21         |
| HTRA2         | MTHFD1          | ATP5A1        | GIN51         | MSI2          | FOSL2         |
| APOE          | DMKN            | CALM2         | D12ERTD647E   | PIK3R1        | GM2A          |
| GNG2          | SCL000896.1_70  | DUSP6         | GIN52         | CRIM1         | CSF2RB2       |
| NGFRAP1       | EG434401        | EIF6          | BC055368      | GLRX          | UTP18         |
| MUC13         | RBM47           | TSPO          | E430003D02RIK | TXNIP         | ATP6AP1       |
| H1F0          | ANGPT1          | MMP8          | LOC635086     | PTPRC         | PTGS1         |
| SKP2          | SEPP1           | TSPAN6        | CKAP4         | 5730536A07RIK | 5430426F23RIK |
| LOC544884     | 4732423C17RIK   | TTK           | 2310043N10RIK | TSPAN13       | RPS27L        |
| THY1          | DOCK11          | LOC672274     | MET           | ANXA5         | MANSC1        |
| LHFPL2        | KCNG2           | IL15          | MGL1          | MSI2H         | PFAS          |
| NME2          | STX3            | ZFP787        | ITGA6         | ANXA3         | LYZS          |
| 6620401M08RIK | EXOSC3          | LOC100039636  | SERPIN6B      | LOC100041500  | LOC383981     |
| NME1          | MCPT8           | ST3GAL1       | LOC100046513  | IRF8          | TMEM147       |
| 1110046J11RIK | LOC229810       | GP5           | PPIC          | TMEM165       | APP           |
| SIPA1L1       | NAB2            | OLFR553       | PTTG1IP       | PECAM1        | RRP1B         |
| CD33          | TNFSF12-TNFSF13 | LRRCS9        | DNAJB1        | SLC18A2       | SLC24A3       |
| AA388235      | RNPEP           | HIRIP3        | EG620119      | APAF1         | MC5R          |
| IRAK1BP1      | PYCR1           | ASPH          | NGK7          | ELA2          | FGL2          |
| GCAP27        | SORD            | RBMS1         | KCTD12        | 2700094K13RIK | B4GALT6       |
| HSD17B10      | PRTN3           | LOC674195     | SLC45A3       | 1110012O05RIK | RUNX2         |
| LOC671523     | KIT             | D130026O08RIK | IER3          | SLC14A1       | PAPSS2        |
| RCC1          | HPRT1           | DTX3L         | LOC224163     | MGST1         | SRGN          |
| ADAP1         | LOC270665       | MFGE8         | DSTN          | LOC667395     | FNDC3B        |
| HSPA1L        | CTLA2A          | PKIB          | ACOT7         |               | GCAP26        |
| CLECSF9       | BEST1           | DDIT4         | LOC383077     |               | AATK          |
| LOC666036     | DAPP1           | HHEX          | ALAS1         |               | MSH6          |
| CENTD3        | LOC638935       | LAT2          | GPC3          |               | LYZ2          |
| OSBPL5        | HK3             | FBNP1L        | UBE1L         |               | UPF1          |
| KLF6          | TRP53INP1       | DTWD2         | CDK10         |               | LY78          |
| GM1964        | HBP1            | H2-OB         | RTEL1         |               | MS4A3         |
| IKZF2         | CD27            | A230072B04RIK | IMPDH2        |               | LOC384418     |
| PAIP2         | MLLT3           | PHKA2         | PRKCA         |               | ATP6V1D       |
| YTHDC2        | SOAT1           | 1110020P15RIK | EGR1          |               | TMEM38B       |
| GAS7          | SELP            | LOC100045864  | HSP90AA1      |               | IFIT2         |
| LOC547343     | PAOX            | ASS1          | CYCS          |               | CCND2         |
| LOC382264     | SELL            | PAFAH2        | 4921515J06RIK |               | GRN           |
| FBNP1         | FADS1           | BC003498      | PADI2         |               | MARCKS        |
| RPE           | TMEM9           | CCL9          | KIF1B         |               | 8030467N07RIK |
| RNF6          | CSNK2B          | SOX4          | LOC100041835  |               | PGCP          |

|           |        |               |        |          |
|-----------|--------|---------------|--------|----------|
| RGS1      | STAT3  | ITGB2         | FRMD4A | AI447904 |
| CNIH4     | ITPR2  | PSMA7         | UCL5   | PRNP     |
| CCT8      | PHF17  | 6330407118RIK | SLPI   |          |
| LOC666559 | TUBA8  | NOLA2         | TREM3  |          |
| PARP6     | PSMD14 | NOLA3         | CTSG   |          |

ACCEPTED MANUSCRIPT

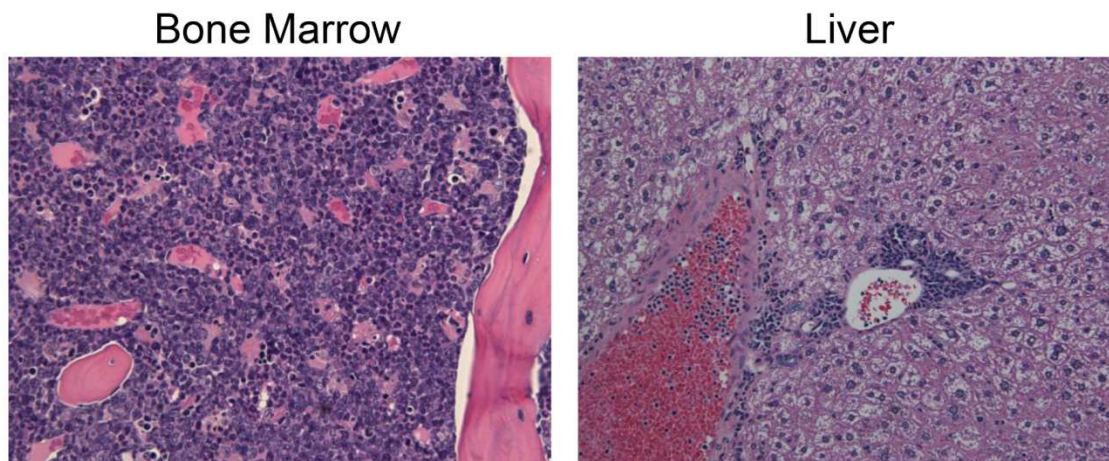

**Supplementary Figure S1. Myeloproliferative disorder induced by *HOXC6* overexpression.**

Histology of BM and liver from a *HOXC6* expressing primary mouse that was diagnosed with a myeloproliferative disease due to absence of excessive blasts in analysed tissues. Furthermore some infiltrations of hematopoietic cells into the liver were found (Hematoxylin-Eosin staining; x20).

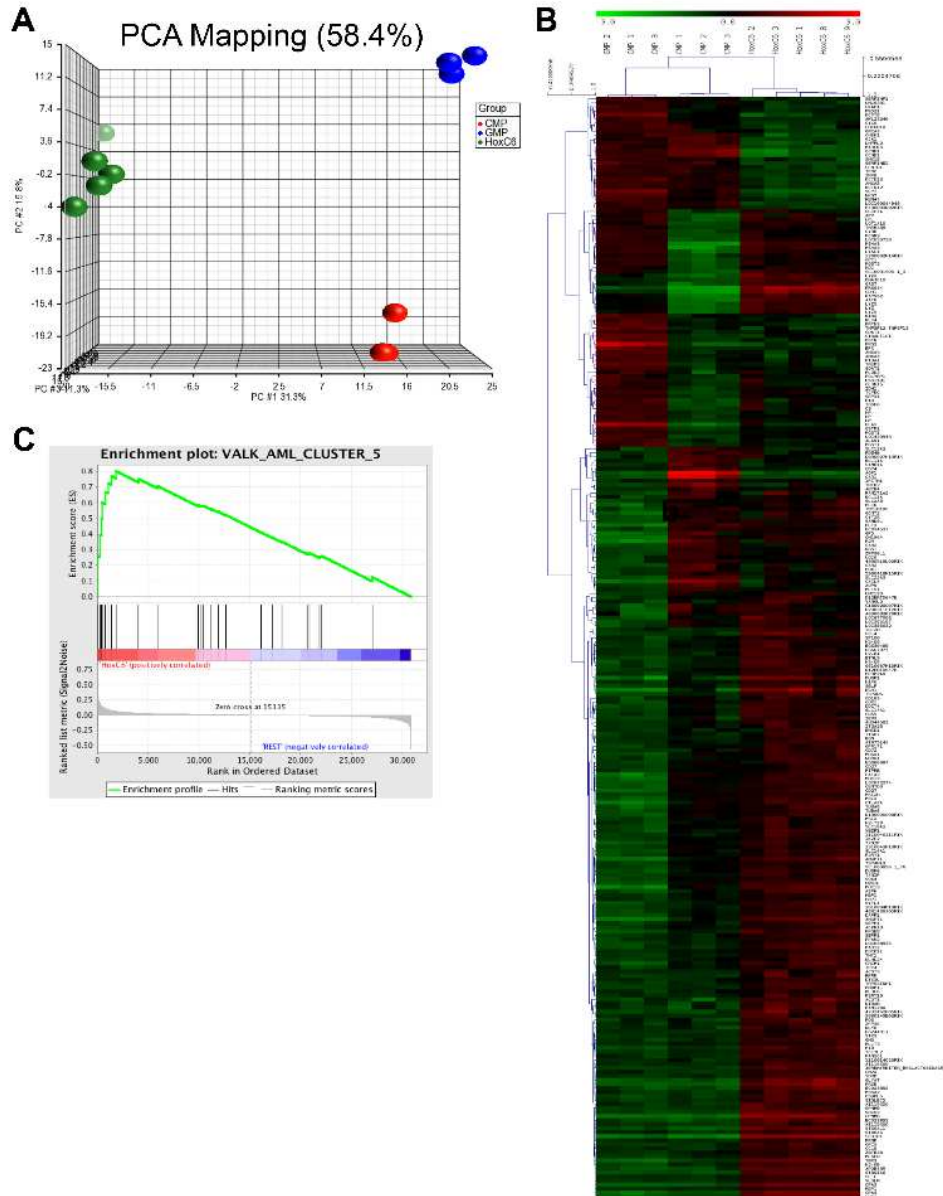

**Supplementary Figure S2. *HOXC6* expressing progenitors show clearly distinct gene expression and can be identified as AML gene signature.** (A) Principle component analysis of the cDNA microarray data shows independent clustering of GFP control CMP samples (red dots), GFP control GMP samples (blue dots), and GMP/CMP-like *HOXC6* samples (green dots). (B) Raw normalized heatmap of relative expression levels of greater than  $\log_2$ -fold regulated genes for the GMP, CMP and *HOXC6* overexpressing cells. (C) GSEA plots further identified

AML gene expression signatures were enriched in the HOXC6 expressing cells (NES 2.02, FDR=0.0).

ACCEPTED MANUSCRIPT
